# Supplementary material
Source: PubMed Central journal article supplement (PMC7171957)
Supplement: DB191046SupplementaryData.pdf [file DB191046SupplementaryData.pdf]

**Online-Only Supplemental Material**

**Risk Factors for Diabetic Peripheral Neuropathy and Cardiovascular Autonomic Neuropathy in the Diabetes Control and Complications Trial/Epidemiology of Diabetes Interventions and Complications (DCCT/EDIC) Study**

This document presents supplemental materials cited in the text of the main manuscript.

**Supplementary Table S1.** Risk factors employed in the analyses by block

**Supplementary Table S2.** Odds ratios for DPN and CAN per unit change in each time-dependent covariate in separate longitudinal GEE models, with no additional adjustments

**Supplementary Table S3.** Multivariable GEE models for DPN and CAN as a function of baseline and time-dependent covariates, using backwards elimination

**Supplementary Table S4.** Final multivariable GEE models for DPN and CAN as a function of baseline and time-dependent covariates, including diabetic retinopathy

SUPPLEMENTARY DATA

**Supplementary Table S1. Risk factors employed in the analyses by block**

| Block | Variable                                           | Availability* |
|-------|----------------------------------------------------|---------------|
| 1.    | <b>Design</b>                                      |               |
|       | Treatment group (conventional vs. intensive)       | B             |
|       | Cohort (secondary vs. primary)                     | B             |
|       | <b><u>Demographic</u></b>                          |               |
| 2.    | <b>Physical</b>                                    |               |
|       | Sex (men vs. women)                                | B             |
|       | Age (years)                                        | B             |
|       | Adult ( $\geq 18$ years vs. $< 18$ )               | B             |
|       | Height (cm)                                        | B, C†         |
|       | Weight (kg)                                        | B, C†, M†     |
|       | Weight gain (kg)                                   | C†            |
|       | Body mass index ( $\text{kg}/\text{m}^2$ )         | B, C†, M†     |
| 3.    | <b>Behavioral</b>                                  |               |
|       | Current cigarette smoker (yes vs. no)              | B, C†         |
|       | Occasional or regular alcohol use (yes vs. none)   | B, C†         |
|       | Moderate or strenuous activity (yes vs. sedentary) | B, C†         |
| 4.    | <b>Family history</b>                              |               |
|       | Family history                                     |               |
|       | Hypertension (yes vs. no)                          | B             |
|       | Myocardial infarction (yes vs. no)                 | B             |
|       | Type 1 diabetes (yes vs. no)                       | B             |
|       | Type 2 diabetes (yes vs. no)                       | B             |
|       | <b><u>Traditional</u></b>                          |               |
| 5.    | <b>Blood pressure</b>                              |               |
|       | Systolic blood pressure (mm Hg)                    | B, C†, M†     |
|       | Diastolic blood pressure (mm Hg)                   | B, C†, M†     |
|       | Pulse pressure (mm Hg)                             | B, C†         |
|       | Pulse (bpm)                                        | B, C†, M†     |
|       | Hypertension (yes vs. no)                          | B, C†         |
| 6.    | <b>Medications</b>                                 |               |
|       | ACE inhibitor use (yes vs. no)                     | C‡            |
|       | ARB use (yes vs. no)                               | C‡            |
|       | $\beta$ -blocker use (yes vs. no)                  | C‡            |
|       | Calcium channel blocker use (yes vs. no)           | C‡            |
|       | Lipid-lowering agent use (yes vs. no)              | C‡            |
| 7.    | <b>Lipids</b>                                      |               |
|       | Total cholesterol (mg/dl)                          | B, C§, M§     |
|       | Triglycerides (mg/dl)                              | B, C§, M§     |
|       | HDL cholesterol (mg/dl)                            | B, C§, M§     |
|       | LDL cholesterol (mg/dl)                            | B, C§, M§     |
|       | Hyperlipidemia (yes vs. no)                        | B, C§         |
|       | <b><u>Diabetes-related</u></b>                     |               |
| 8.    | <b>History of diabetes</b>                         |               |
|       | Duration of type 1 diabetes (years)                | B             |
|       | Stimulated C-peptide (nmol/L)                      | B             |
|       | Duration $< 5$ years                               |               |
|       | Duration $\geq 5$ years                            |               |
|       | Insulin dose (units/kg/day)                        | B, C†, M†     |

SUPPLEMENTARY DATA

**Supplementary Table S1. Risk factors employed in the analyses by block (continued)**

| Block      |                       | Variable                            | Availability* |
|------------|-----------------------|-------------------------------------|---------------|
| <b>9.</b>  | <b>Kidney Disease</b> | eGFR (mL/min/1.73 m <sup>2</sup> )  | B, C†         |
|            |                       | eGFR <60 mL/min/1.73 m <sup>2</sup> | B, C†, A†     |
|            |                       | AER (mg/24 hour)                    | B, C§         |
|            |                       | Sustained AER ≥30 mg/24 hour        | B, C§, A§     |
|            |                       | AER ≥300 mg/24 hour                 | B, C§, A§     |
| <b>10.</b> | <b>Hypoglycemia</b>   | Coma and/or seizure                 | B, C†         |
|            |                       | Requiring assistance                | B, C†         |
| <b>11.</b> | <b>Glycemia</b>       | HbA1c (%)                           | B, C†, M†     |

ACE=angiotensin-converting enzyme, AER=albumin excretion rate, ARB=angiotensin II receptor blocker, eGFR=estimated glomerular filtration rate, HDL=high-density lipoprotein, LDL=low-density lipoprotein.

\*B=Baseline value, C=Current value, M=Updated mean value, A=Cumulative incidence (e.g. any use). Covariates classified as C, M, and A enter into the analyses as time-dependent covariates.

†Collected annually during DCCT and EDIC.

‡Collected annually in EDIC only.

§Collected annually in DCCT, every two years in EDIC.

SUPPLEMENTARY DATA

**Supplementary Table S2. Odds ratios for DPN and CAN per unit change in each time-dependent covariate in separate longitudinal GEE models, with no additional adjustments**

|                                                    |   | DPN                    |         | CAN                    |         |
|----------------------------------------------------|---|------------------------|---------|------------------------|---------|
|                                                    | * | Odds Ratio<br>(95% CI) | p-value | Odds Ratio<br>(95% CI) | p-value |
| <b>Physical</b>                                    |   |                        |         |                        |         |
| Height (per 5 cm)                                  | C | 1.21 (1.14,1.28)       | <0.0001 | 0.98 (0.94,1.04)       | 0.5400  |
| Weight (per 5 kg)                                  | C | 1.09 (1.06,1.12)       | <0.0001 | 1.03 (1.00,1.06)       | 0.0481  |
| Mean weight (per 5 kg)                             | M | 1.13 (1.09,1.17)       | <0.0001 | 1.04 (1.00,1.08)       | 0.0319  |
| Body mass index (per 1 kg/m <sup>2</sup> )         | C | 1.02 (1.00,1.04)       | 0.0814  | 1.02 (1.01,1.04)       | 0.0081  |
| Mean body mass index (per 1 kg/m <sup>2</sup> )    | M | 1.04 (1.01,1.07)       | 0.0040  | 1.04 (1.01,1.07)       | 0.0063  |
| <b>Behavioral</b>                                  |   |                        |         |                        |         |
| Current cigarette smoker (yes vs. no)              | C | 1.21 (0.93,1.56)       | 0.1545  | 1.49 (1.19,1.86)       | 0.0005  |
| Occasional or regular alcohol use (yes vs. none)   | C | 1.11 (0.91,1.36)       | 0.3028  | 0.86 (0.74,1.01)       | 0.0605  |
| Moderate or strenuous activity (yes vs. sedentary) | C | 1.04 (0.87,1.26)       | 0.6507  | 0.85 (0.74,0.98)       | 0.0212  |
| <b>Blood pressure</b>                              |   |                        |         |                        |         |
| Systolic blood pressure (per 5 mm Hg)              | C | 1.10 (1.06,1.14)       | <0.0001 | 1.12 (1.09,1.15)       | <0.0001 |
| Mean systolic blood pressure (per 5 mm Hg)         | M | 1.18 (1.12,1.25)       | <0.0001 | 1.29 (1.22,1.36)       | <0.0001 |
| Diastolic blood pressure (per 5 mm Hg)             | C | 1.06 (1.01,1.12)       | 0.0304  | 1.03 (0.99,1.07)       | 0.1493  |
| Mean diastolic blood pressure (per 5 mm Hg)        | M | 1.23 (1.13,1.34)       | <0.0001 | 1.24 (1.14,1.35)       | <0.0001 |
| Pulse pressure (per 5 mm Hg)                       | C | 1.10 (1.06,1.15)       | <0.0001 | 1.14 (1.11,1.18)       | <0.0001 |
| Pulse rate (per 1 bpm)                             | C | 1.02 (1.01,1.03)       | <0.0001 | 1.03 (1.03,1.04)       | <0.0001 |
| Mean pulse rate (per 1 bpm)                        | M | 1.04 (1.03,1.05)       | <0.0001 | 1.07 (1.06,1.09)       | <0.0001 |
| Hypertension (yes vs. no)                          | C | 2.23 (1.75,2.83)       | <0.0001 | 2.15 (1.80,2.57)       | <0.0001 |
| <b>Medications</b>                                 |   |                        |         |                        |         |
| ACE inhibitor use (yes vs. no)                     | C | 1.64 (1.29,2.09)       | <0.0001 | 1.59 (1.33,1.91)       | <0.0001 |
| ARB use (yes vs. no)                               | C | 1.43 (1.01,2.02)       | 0.0425  | 1.59 (1.25,2.04)       | 0.0002  |
| β-blocker use (yes vs. no)                         | C | 3.73 (2.38,5.85)       | <0.0001 | 3.14 (2.26,4.36)       | <0.0001 |
| Calcium channel blocker use (yes vs. no)           | C | 1.68 (1.06,2.67)       | 0.0259  | 1.92 (1.40,2.64)       | <0.0001 |
| Lipid-lowering agent use (yes vs. no)              | C | 1.39 (1.09,1.76)       | 0.0068  | 1.60 (1.34,1.93)       | <0.0001 |
| <b>Lipids</b>                                      |   |                        |         |                        |         |
| Total cholesterol (per 10 mg/dl)                   | C | 1.01 (0.98,1.04)       | 0.4893  | 1.01 (0.99,1.03)       | 0.4554  |
| Mean total cholesterol (per 10 mg/dl)              | M | 1.09 (1.06,1.13)       | <0.0001 | 1.11 (1.08,1.15)       | <0.0001 |
| Triglycerides (per 20% increase mg/dl)             | C | 1.10 (1.06,1.13)       | <0.0001 | 1.08 (1.05,1.11)       | <0.0001 |
| Mean triglycerides (per 20% increase mg/dl)        | M | 1.15 (1.10,1.20)       | <0.0001 | 1.16 (1.11,1.20)       | <0.0001 |
| HDL cholesterol (per 10 mg/dl)                     | C | 0.91 (0.84,0.98)       | 0.0089  | 0.97 (0.92,1.02)       | 0.2050  |

SUPPLEMENTARY DATA

**Supplementary Table S2. Odds ratios for DPN and CAN per unit change in each time-dependent covariate in separate longitudinal GEE models, with no additional adjustments (continued)**

|                                                      | * | DPN                 |         | CAN                 |         |
|------------------------------------------------------|---|---------------------|---------|---------------------|---------|
|                                                      |   | Odds Ratio (95% CI) | p-value | Odds Ratio (95% CI) | p-value |
| Mean HDL cholesterol (per 10 mg/dl)                  | M | 0.91 (0.84,1.00)    | 0.0403  | 0.99 (0.92,1.07)    | 0.7708  |
| LDL cholesterol (per 10 mg/dl)                       | C | 1.00 (0.98,1.04)    | 0.7969  | 1.00 (0.97,1.02)    | 0.8175  |
| Mean LDL cholesterol (per 10 mg/dl)                  | M | 1.10 (1.05,1.14)    | <0.0001 | 1.10 (1.06,1.14)    | <0.0001 |
| Hyperlipidemia (yes vs. no)                          | C | 1.30 (1.07,1.59)    | 0.0087  | 1.50 (1.29,1.76)    | <0.0001 |
| <b>History of diabetes</b>                           |   |                     |         |                     |         |
| Insulin dose (per 1 unit/kg/day)                     | C | 1.22 (0.88,1.71)    | 0.2370  | 1.35 (1.06,1.72)    | 0.0152  |
| Mean insulin dose (per 1 unit/kg/day)                | M | 1.35 (0.86,2.11)    | 0.1960  | 1.41 (0.92,2.16)    | 0.1199  |
| <b>Kidney Disease</b>                                |   |                     |         |                     |         |
| eGFR (per 5 mL/min/1.73 m <sup>2</sup> )             | C | 0.91 (0.89,0.94)    | <0.0001 | 0.91 (0.89,0.93)    | <0.0001 |
| eGFR <60 mL/min/1.73 m <sup>2</sup> (yes vs. no)     | C | 3.39 (1.96,5.85)    | <0.0001 | 5.95 (3.67,9.65)    | <0.0001 |
| Any eGFR <60 mL/min/1.73 m <sup>2</sup> (yes vs. no) | A | 3.23 (2.05,5.10)    | <0.0001 | 3.53 (2.40,5.19)    | <0.0001 |
| AER (per 20% increase mg/24 hour)                    | C | 1.07 (1.05,1.08)    | <0.0001 | 1.06 (1.05,1.07)    | <0.0001 |
| Sustained AER ≥30 mg/24 hour (yes vs. no)            | C | 2.98 (2.34,3.78)    | <0.0001 | 2.56 (2.06,3.18)    | <0.0001 |
| Any sustained AER ≥30 mg/24 hour (yes vs. no)        | A | 2.75 (2.21,3.42)    | <0.0001 | 2.75 (2.26,3.36)    | <0.0001 |
| AER ≥300 mg/24 hour (yes vs. no)                     | C | 4.72 (3.08,7.25)    | <0.0001 | 3.36 (2.28,4.95)    | <0.0001 |
| Any AER ≥300 mg/24 hour (yes vs. no)                 | A | 4.45 (3.17,6.25)    | <0.0001 | 3.22 (2.34,4.42)    | <0.0001 |
| <b>Hypoglycemia</b>                                  |   |                     |         |                     |         |
| Coma and/or seizure (yes vs. no)                     | C | 0.86 (0.52,1.44)    | 0.5671  | 0.91 (0.68,1.23)    | 0.5503  |
| Requiring assistance (yes vs. no)                    | C | 1.01 (0.74,1.36)    | 0.9691  | 0.98 (0.79,1.21)    | 0.8601  |
| <b>Glycemia</b>                                      |   |                     |         |                     |         |
| HbA1c (per 1 %)                                      | C | 1.32 (1.24,1.40)    | <0.0001 | 1.11 (1.05,1.17)    | 0.0004  |
| Mean HbA1c (per 1 %)                                 | M | 1.59 (1.48,1.71)    | <0.0001 | 1.36 (1.26,1.46)    | <0.0001 |

Data are based on 1,386 participants with at least two DPN assessments or 1,434 participants with at least two CAN assessments during DCCT/EDIC. Odds ratios and p-values were generated using generalized estimating equation (GEE) models, unadjusted. Triglyceride and AER values were log transformed and the odds ratios are presented per 20% increase in the covariate (1.2<sup>b</sup>). ACE=angiotensin-converting enzyme, AER=albumin excretion rate, ARB=angiotensin II receptor blocker, eGFR=estimated glomerular filtration rate, HDL=high-density lipoprotein, LDL=low-density lipoprotein.

<sup>a</sup> B=Baseline value, C=Current value, M=Updated mean value, A=Cumulative incidence (e.g. any use). Covariates classified as C, M, and A enter into the analyses as time-dependent covariates.

SUPPLEMENTARY DATA

**Supplementary Table S3. Multivariable GEE models for DPN and CAN as a function of baseline and time-dependent covariates, using backwards elimination**

| <b>Diabetic Peripheral Neuropathy (DPN)</b>         | <b>Odds Ratio (95% CI)</b> | <b>Z-value</b> | <b>p-value</b> |
|-----------------------------------------------------|----------------------------|----------------|----------------|
| Mean HbA1c (per 1%)                                 | 1.71 (1.58,1.86)           | 12.86          | <0.0001        |
| Duration of type 1 diabetes (per 1 year)            | 1.12 (1.09,1.15)           | 8.68           | <0.0001        |
| Age (per 5 years)                                   | 1.44 (1.32,1.57)           | 7.99           | <0.0001        |
| Any AER $\geq$ 300 mg/24 hour (yes vs. no)          | 3.52 (2.40,5.17)           | 6.42           | <0.0001        |
| Height (per 5 cm)                                   | 1.35 (1.23,1.48)           | 6.30           | <0.0001        |
| $\beta$ -blocker use (yes vs. no)                   | 2.57 (1.50,4.41)           | 3.43           | 0.0006         |
| Mean insulin dose (per 1 unit/kg/day)               | 2.05 (1.16,3.60)           | 2.48           | 0.0130         |
| Sex (men vs. women)                                 | 0.67 (0.47,0.94)           | 2.31           | 0.0207         |
| <b>Cardiac Autonomic Neuropathy (CAN)</b>           | <b>Odds Ratio (95% CI)</b> | <b>Z-value</b> | <b>p-value</b> |
| Age (per 5 years)                                   | 1.55 (1.44,1.67)           | 11.50          | <0.0001        |
| Duration of type 1 diabetes (per 1 year)            | 1.07 (1.05,1.10)           | 5.83           | <0.0001        |
| Mean HbA1c (per 1%)                                 | 1.25 (1.15,1.35)           | 5.49           | <0.0001        |
| Mean pulse rate (per 1 bpm)                         | 1.04 (1.03,1.06)           | 4.79           | <0.0001        |
| Any sustained AER $\geq$ 30 mg/24 hour (yes vs. no) | 1.80 (1.39,2.32)           | 4.52           | <0.0001        |
| $\beta$ -blocker use (yes vs. no)                   | 2.15 (1.48,3.14)           | 3.99           | <0.0001        |
| eGFR $<$ 60 mL/min/1.73 m <sup>2</sup> (yes vs. no) | 2.51 (1.37,4.60)           | 2.98           | 0.0029         |
| Pulse rate (per 1 bpm)                              | 1.02 (1.00,1.03)           | 2.82           | 0.0048         |
| AER (per 20% increase mg/24 hour)                   | 1.02 (1.00,1.03)           | 2.39           | 0.0169         |
| Current cigarette smoker (yes vs. no)               | 1.28 (1.01,1.62)           | 2.08           | 0.0379         |

Data are based on 1,386 participants with at least two DPN assessments or 1,434 participants with at least two CAN assessments during DCCT/EDIC. Odds ratios and p-values were generated using generalized estimating equation (GEE) models. AER values were log transformed and the odds ratios are presented per 20% increase in the covariate (1.2<sup>β</sup>). Covariates are listed in the order of significance as indicated by the Z-value. AER=albumin excretion rate, eGFR=estimated glomerular filtration rate.

SUPPLEMENTARY DATA

**Supplementary Table S4. Final multivariable GEE models for DPN and CAN as a function of baseline and time-dependent covariates, including diabetic retinopathy**

| <b>Diabetic Peripheral Neuropathy (DPN)</b>                  | <b>Odds Ratio (95% CI)</b> | <b>Z-value</b> | <b>p-value</b> |
|--------------------------------------------------------------|----------------------------|----------------|----------------|
| Mean HbA1c (per 1%)                                          | 1.58 (1.46,1.72)           | 10.89          | <0.0001        |
| Age (per 5 years)                                            | 1.41 (1.30,1.54)           | 7.89           | <0.0001        |
| Height (per 5 cm)                                            | 1.27 (1.19,1.35)           | 7.26           | <0.0001        |
| Duration of type 1 diabetes (per 1 year)                     | 1.09 (1.07,1.12)           | 6.73           | <0.0001        |
| Any proliferative diabetic retinopathy or worse (yes vs. no) | 2.14 (1.56,2.93)           | 4.74           | <0.0001        |
| AER (per 20% increase mg/24 hour)                            | 1.04 (1.02,1.05)           | 4.36           | <0.0001        |
| Mean pulse rate (per 1 bpm)                                  | 1.03 (1.01,1.04)           | 3.74           | 0.0002         |
| β-blocker use (yes vs. no)                                   | 2.44 (1.44,4.14)           | 3.30           | 0.0010         |
| <b>Cardiac Autonomic Neuropathy (CAN)</b>                    | <b>Odds Ratio (95% CI)</b> | <b>Z-value</b> | <b>p-value</b> |
| Age (per 5 years)                                            | 1.51 (1.40,1.63)           | 10.63          | <0.0001        |
| Any sustained AER ≥30 mg/24 hour (yes vs. no)                | 1.79 (1.42,2.25)           | 5.01           | <0.0001        |
| Mean HbA1c (per 1%)                                          | 1.21 (1.12,1.31)           | 4.86           | <0.0001        |
| Duration of type 1 diabetes (per 1 year)                     | 1.06 (1.03,1.08)           | 4.53           | <0.0001        |
| Mean pulse rate (per 1 bpm)                                  | 1.04 (1.02,1.06)           | 4.40           | <0.0001        |
| β-blocker use (yes vs. no)                                   | 1.96 (1.33,2.89)           | 3.39           | 0.0007         |
| Systolic blood pressure (per 5 mm Hg)                        | 1.05 (1.02,1.08)           | 3.19           | 0.0014         |
| Any proliferative diabetic retinopathy or worse (yes vs. no) | 1.58 (1.19,2.10)           | 3.18           | 0.0015         |
| Any clinically significant macular edema (yes vs. no)        | 1.48 (1.15,1.90)           | 3.04           | 0.0023         |
| eGFR <60 mL/min/1.73 m <sup>2</sup> (yes vs. no)             | 2.44 (1.37,4.36)           | 3.01           | 0.0026         |
| Pulse rate (per 1 bpm)                                       | 1.02 (1.00,1.03)           | 2.83           | 0.0047         |
| Current cigarette smoker (yes vs. no)                        | 1.33 (1.06,1.69)           | 2.43           | 0.0152         |

Data are based on 1,386 participants with at least two DPN assessments or 1,434 participants with at least two CAN assessments during DCCT/EDIC. Odds ratios and p-values were generated using generalized estimating equation (GEE) models. AER values were log transformed and the odds ratios are presented per 20% increase in the covariate (1.2<sup>β</sup>). Covariates are listed in the order of significance as indicated by the Z-value. AER=albumin excretion rate, eGFR=estimated glomerular filtration rate.
